# Supplementary material for: Residue analysis evidence for wine enriched with vanilla consumed in Jerusalem on the eve of the Babylonian destruction in 586 BCE
Source: PubMed Central journal article supplement (PMC8963535; doi:10.1371/journal.pone.0266085), 2022-03-29

### S4 Fig. GC chromatograms of storage jars found in Building 17049 and included in this study

Vessel 170483: sample 170430: TLE

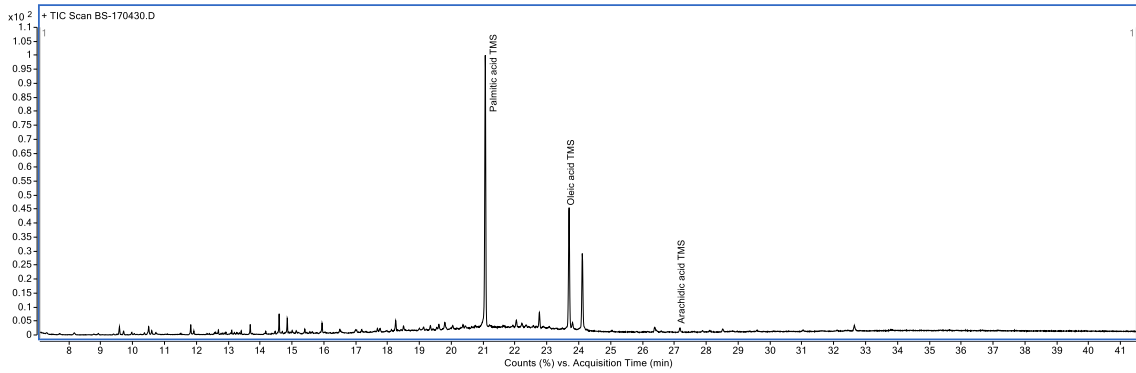

Vessel 170483: sample 170430: WM

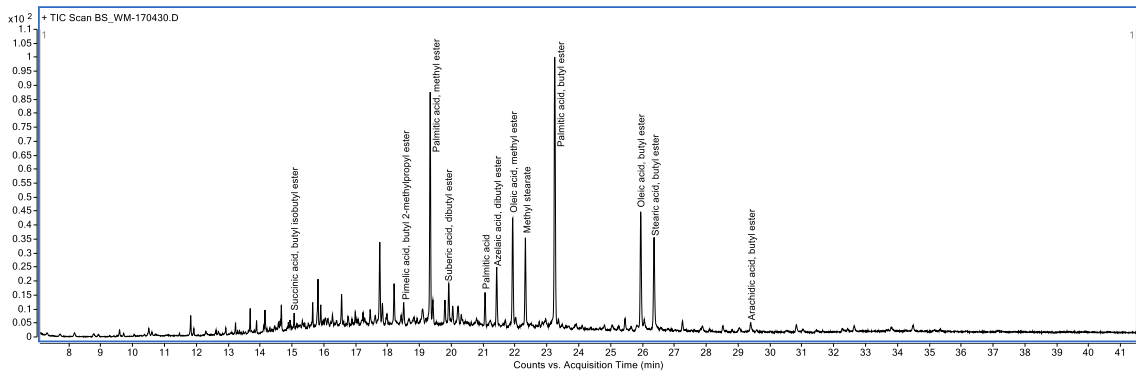

Vessel 170483: sample 170463\_II: TLE

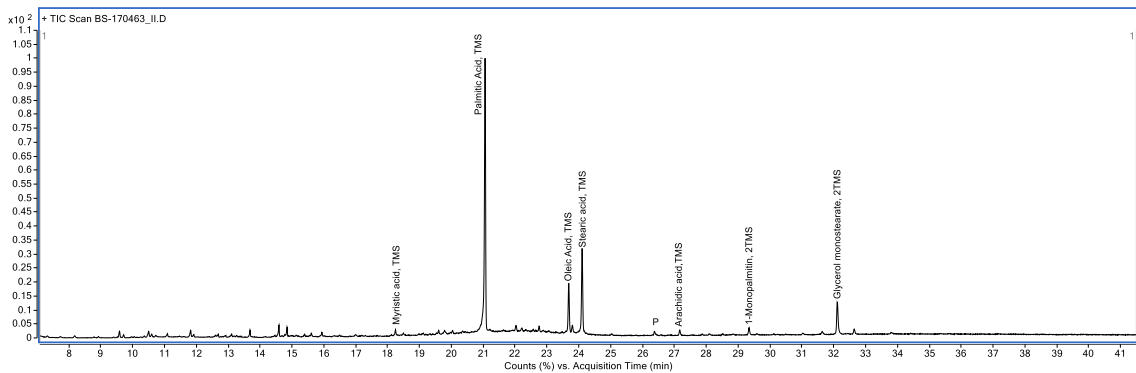

Vessel 170483: sample 170463\_II: WM

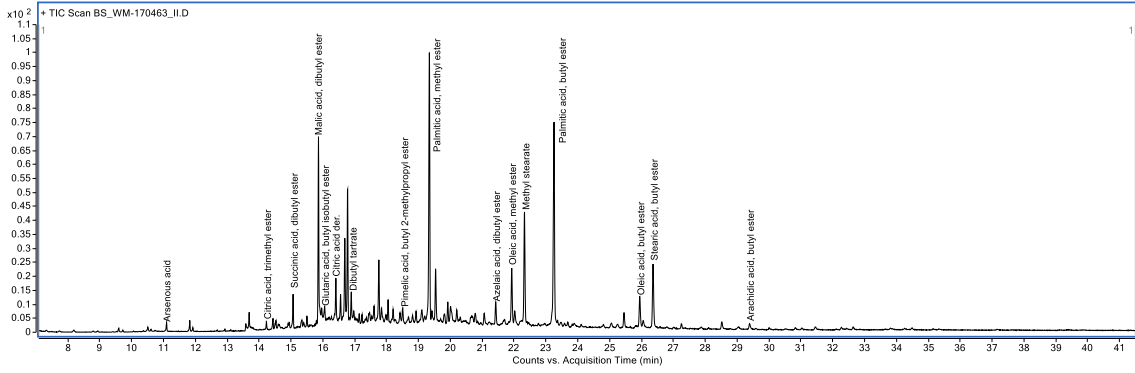

Vessel 170483: sample 170483\_I: TLE

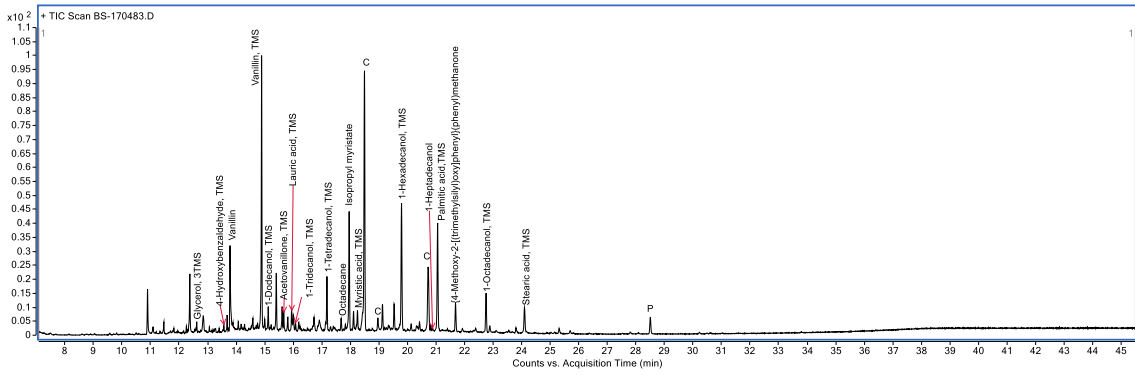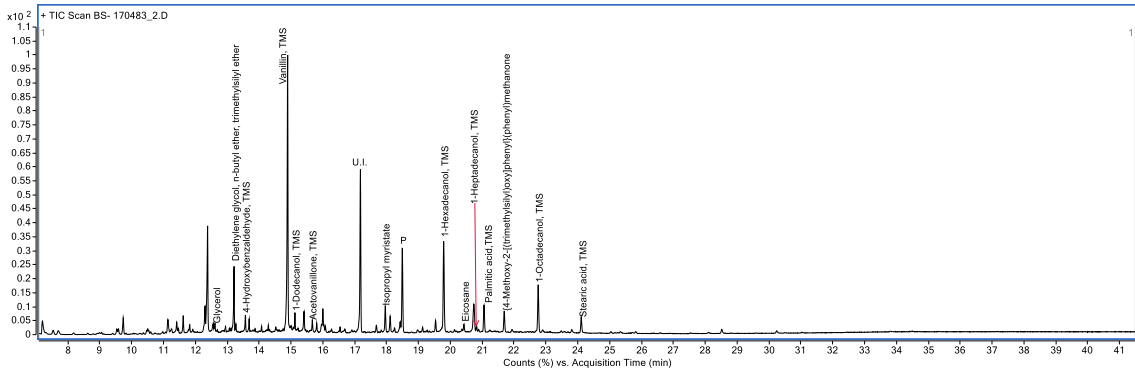

Vessel 170483: sample 170483\_I: WM

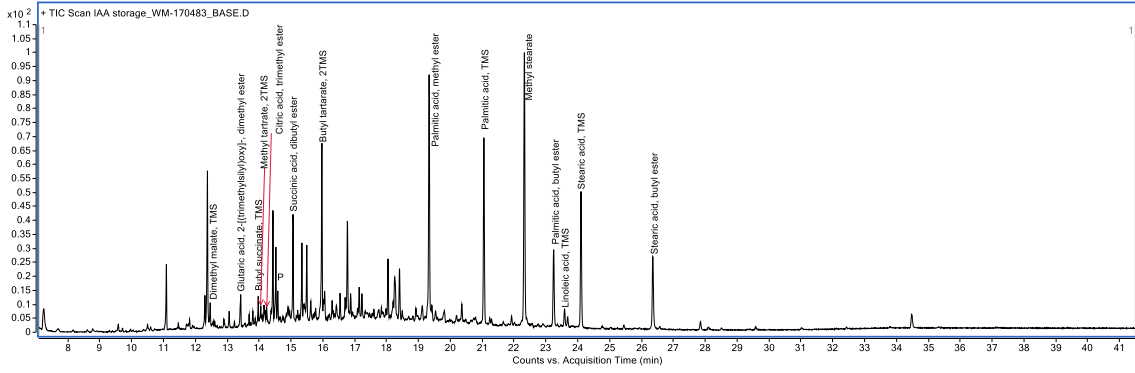

Vessel 170483: sample 170483\_II: WM (TLE not analyzed)

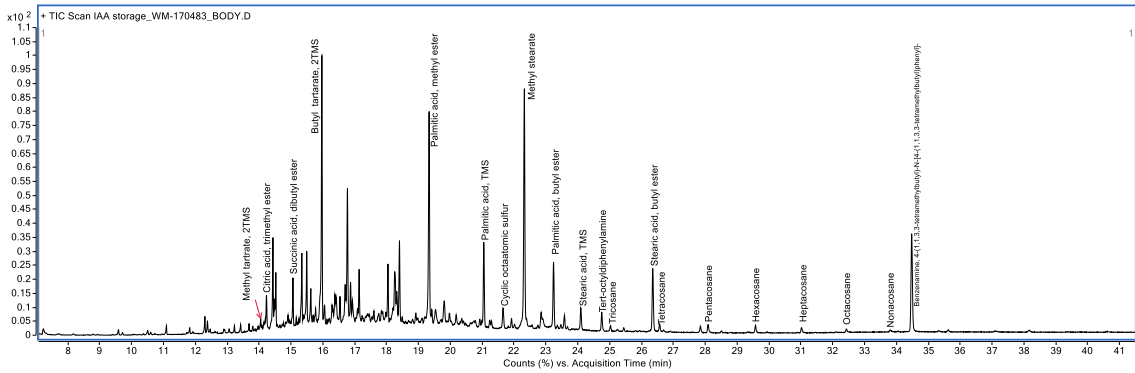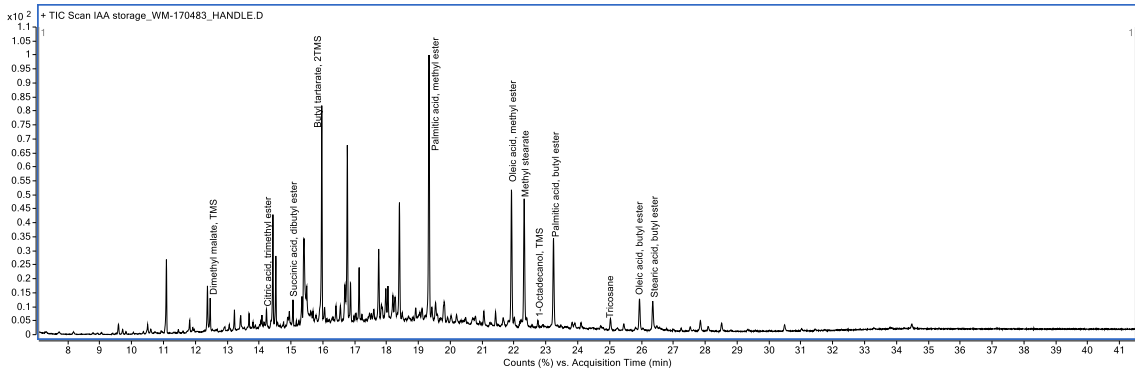

# Vessel 170571: sample 170571\_I: TLE

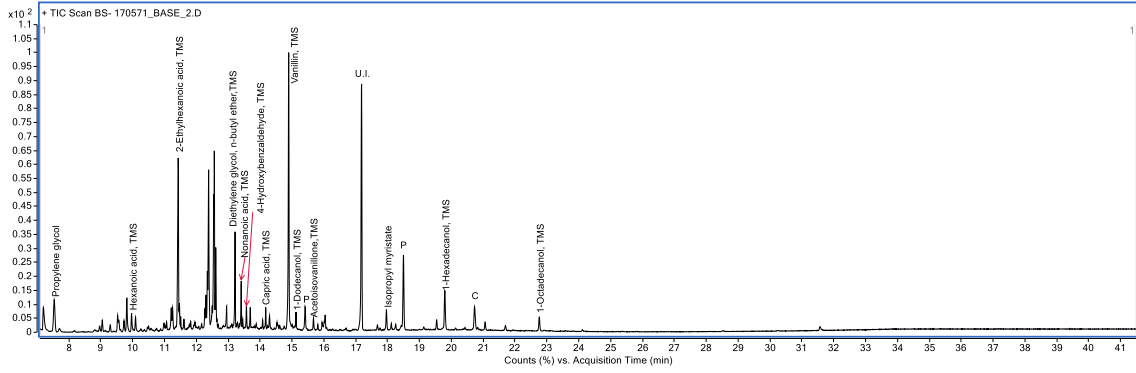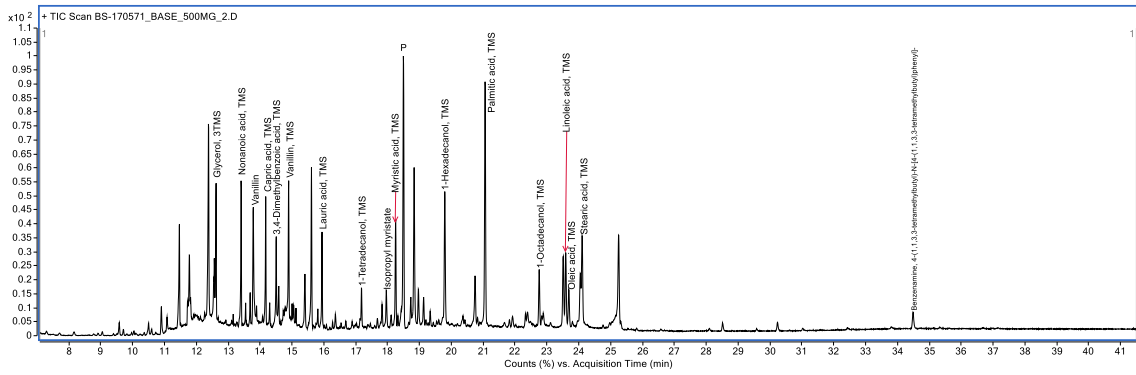

# Vessel 170571: sample 170571\_I: WM

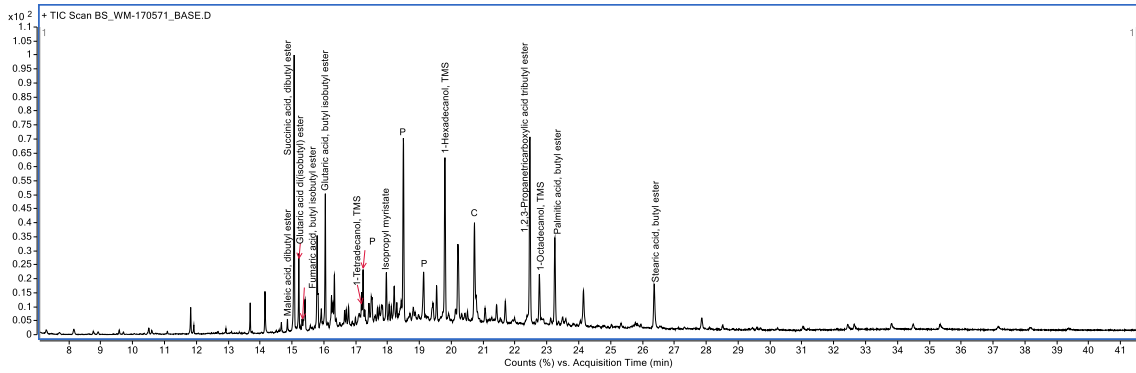

### Vessel 170571: sample 170571\_II: TLE

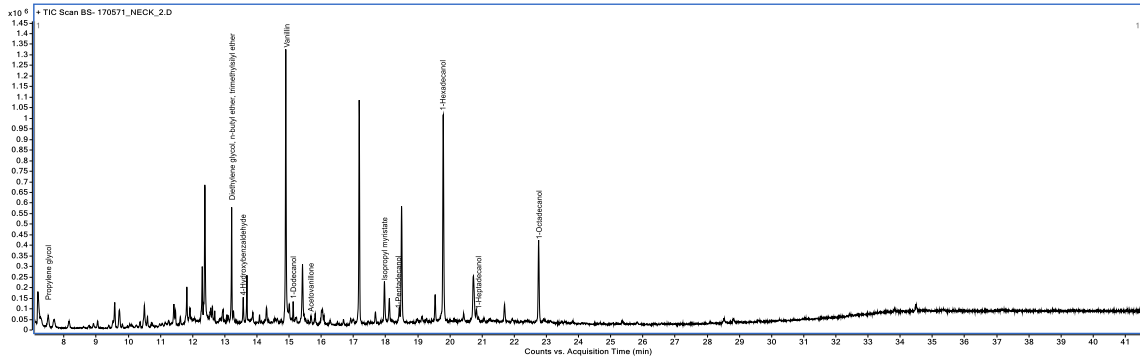

### Vessel 170571: sample 170571\_II: WM

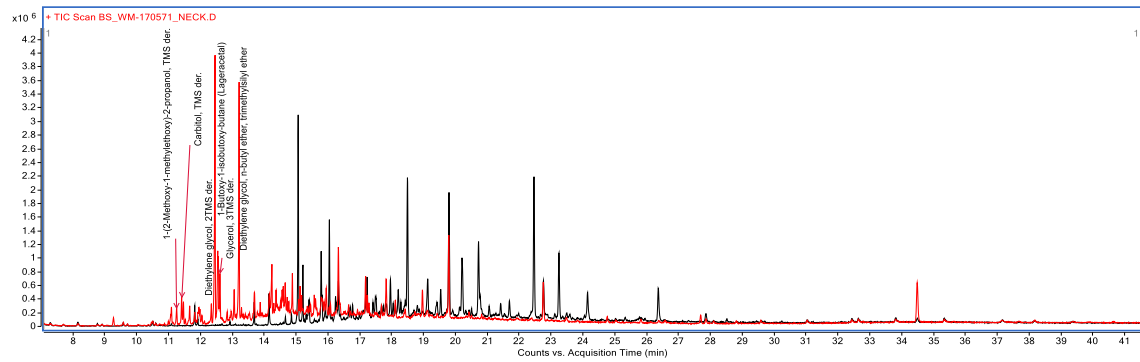

### Vessel 170463\_I: sample 170463\_I: TLE

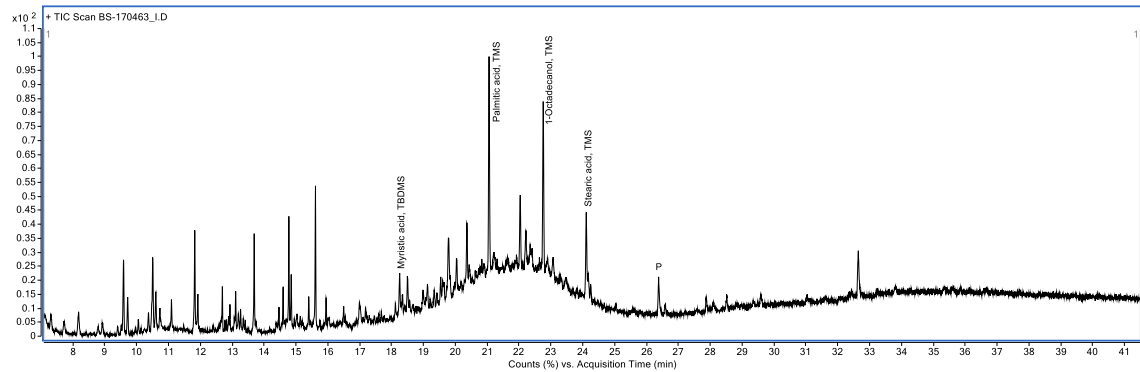

Vessel 170463\_I: sample 170463\_I: WM

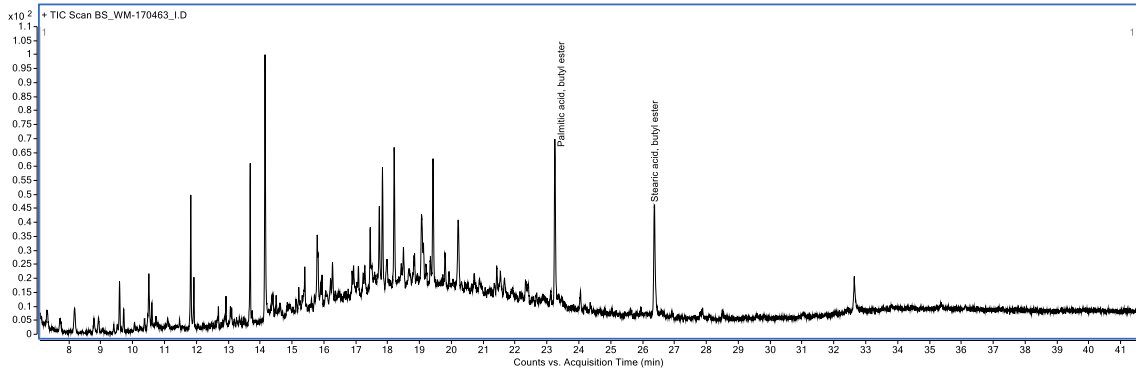

Vessel 170577/190142: sample 170577: TLE (WM not analyzed)

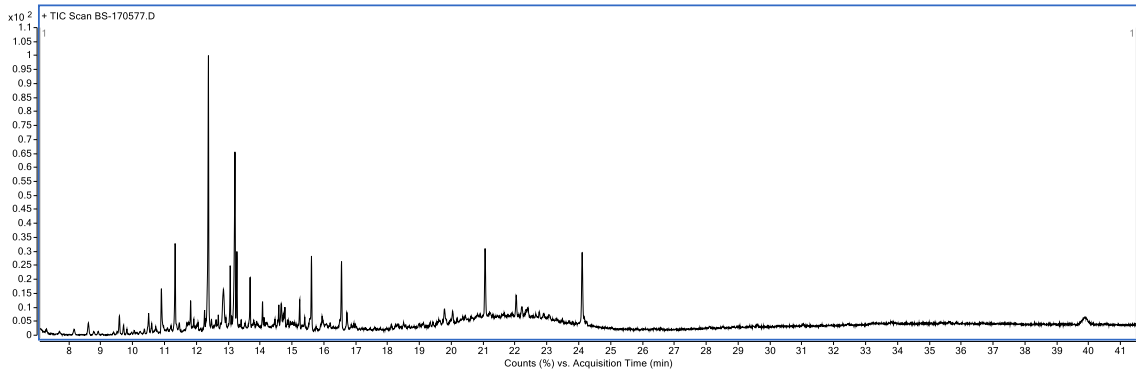

Vessel 170577/190142: sample 190142: TLE (WM not analyzed)

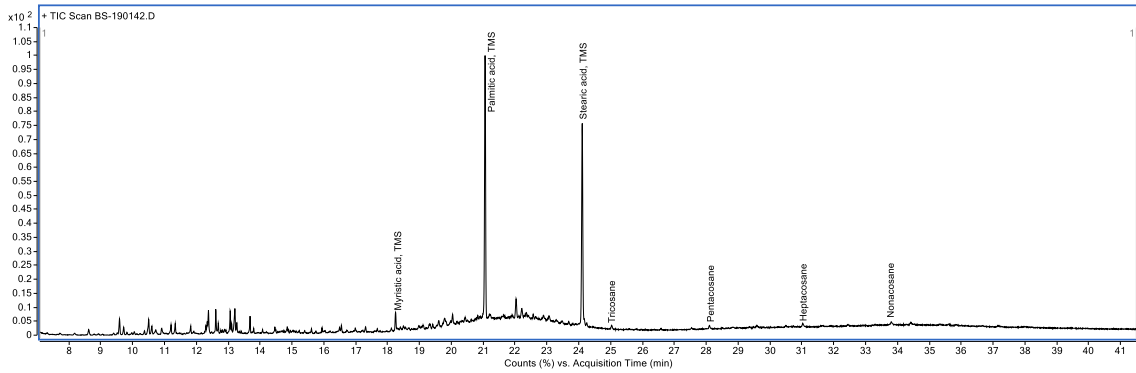

Vessel 170575: sample 170575: TLE (WM not analyzed)

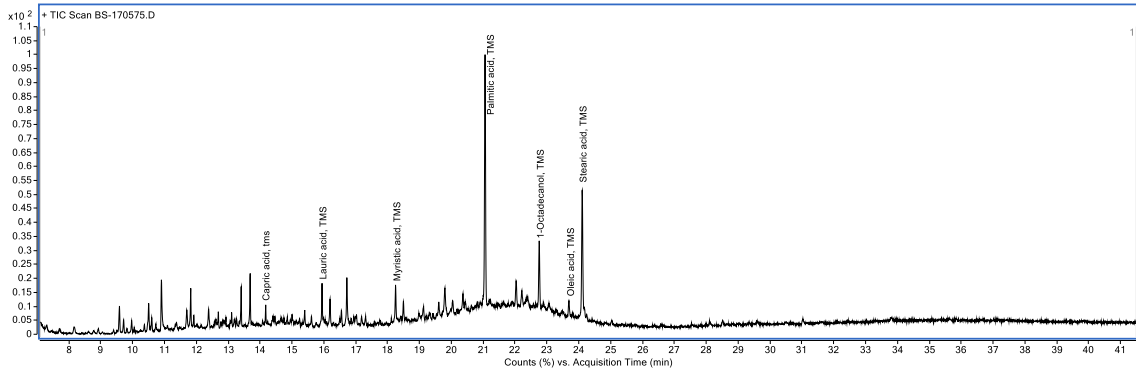

Vessel 170580: sample 170580: TLE

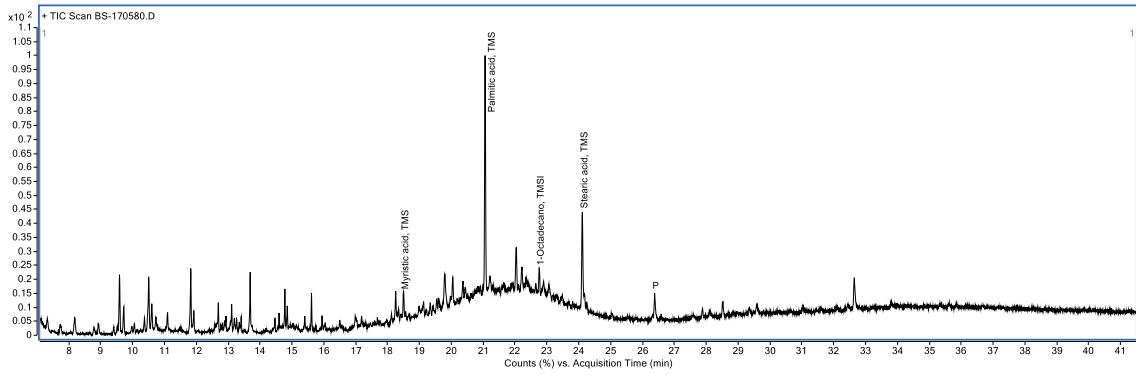

Vessel 170580: sample 170580: WM

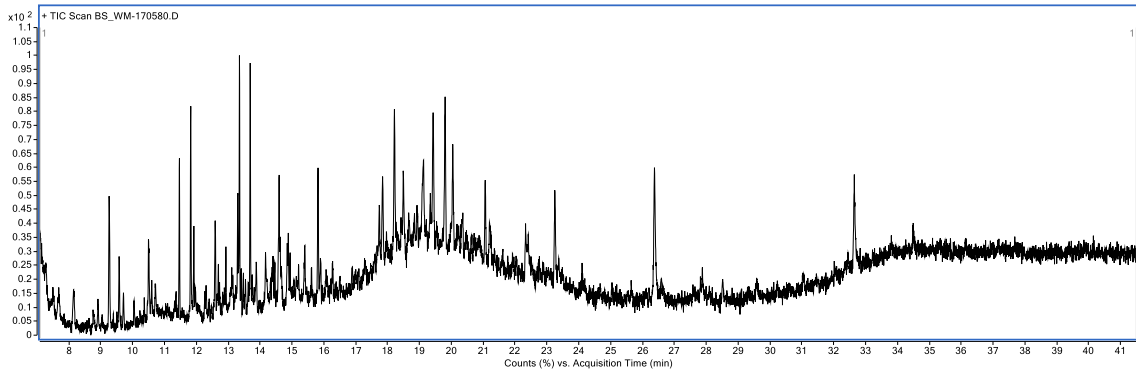

Vessel 170581: sample 170581: TLE (WM not analyzed)

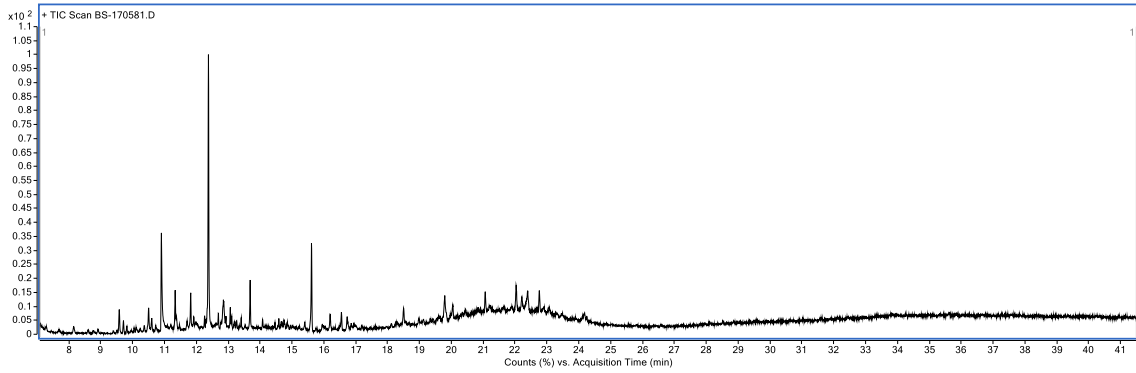

Vessel 171029: sample 171029: TLE (WM not analyzed)

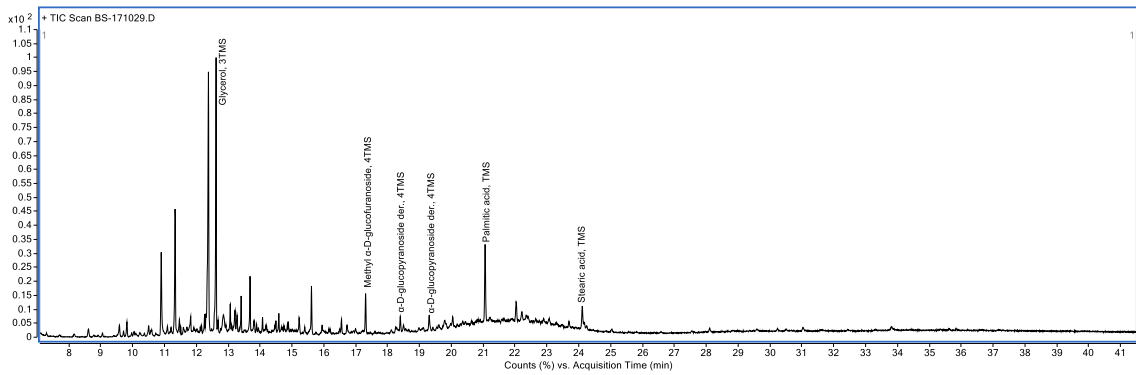

Vessel 190140/1: sample 190140: TLE (WM not analyzed)

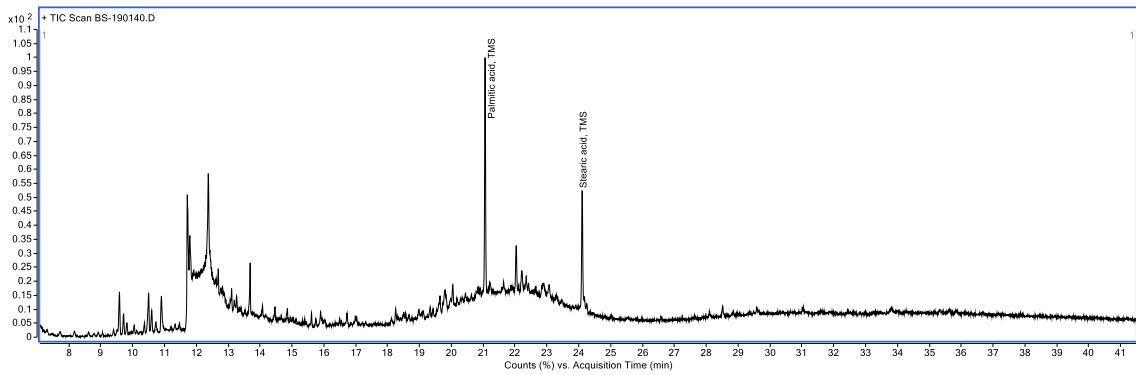



Vessel 190140/1: sample 190141: TLE (WM not analyzed)

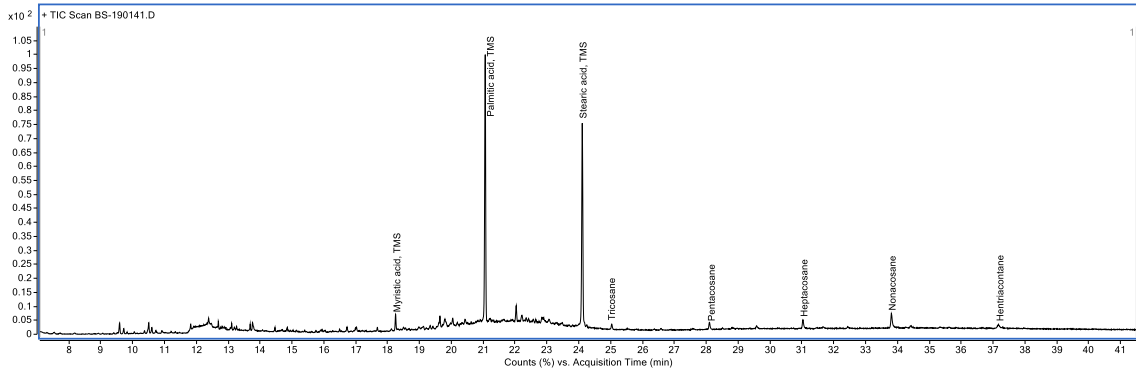

Vessel 190143: sample 190143: TLE (WM not analyzed)

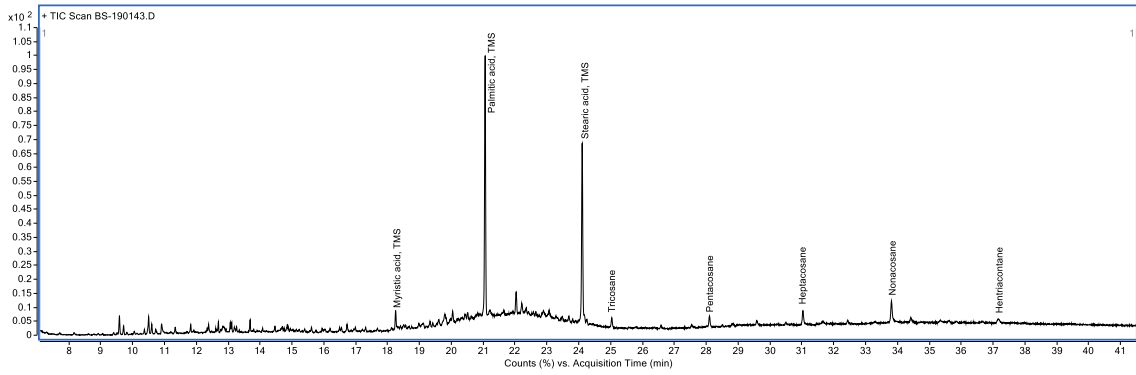

Supplement: pone.0266085.s004.pdf [file pone.0266085.s004.pdf]
