# Supplementary material for: Residue analysis evidence for wine enriched with vanilla consumed in Jerusalem on the eve of the Babylonian destruction in 586 BCE
Source: PubMed Central journal article supplement (PMC8963535; doi:10.1371/journal.pone.0266085), 2022-03-29
Supplement: pone.0266085.s002.pdf [file pone.0266085.s002.pdf]

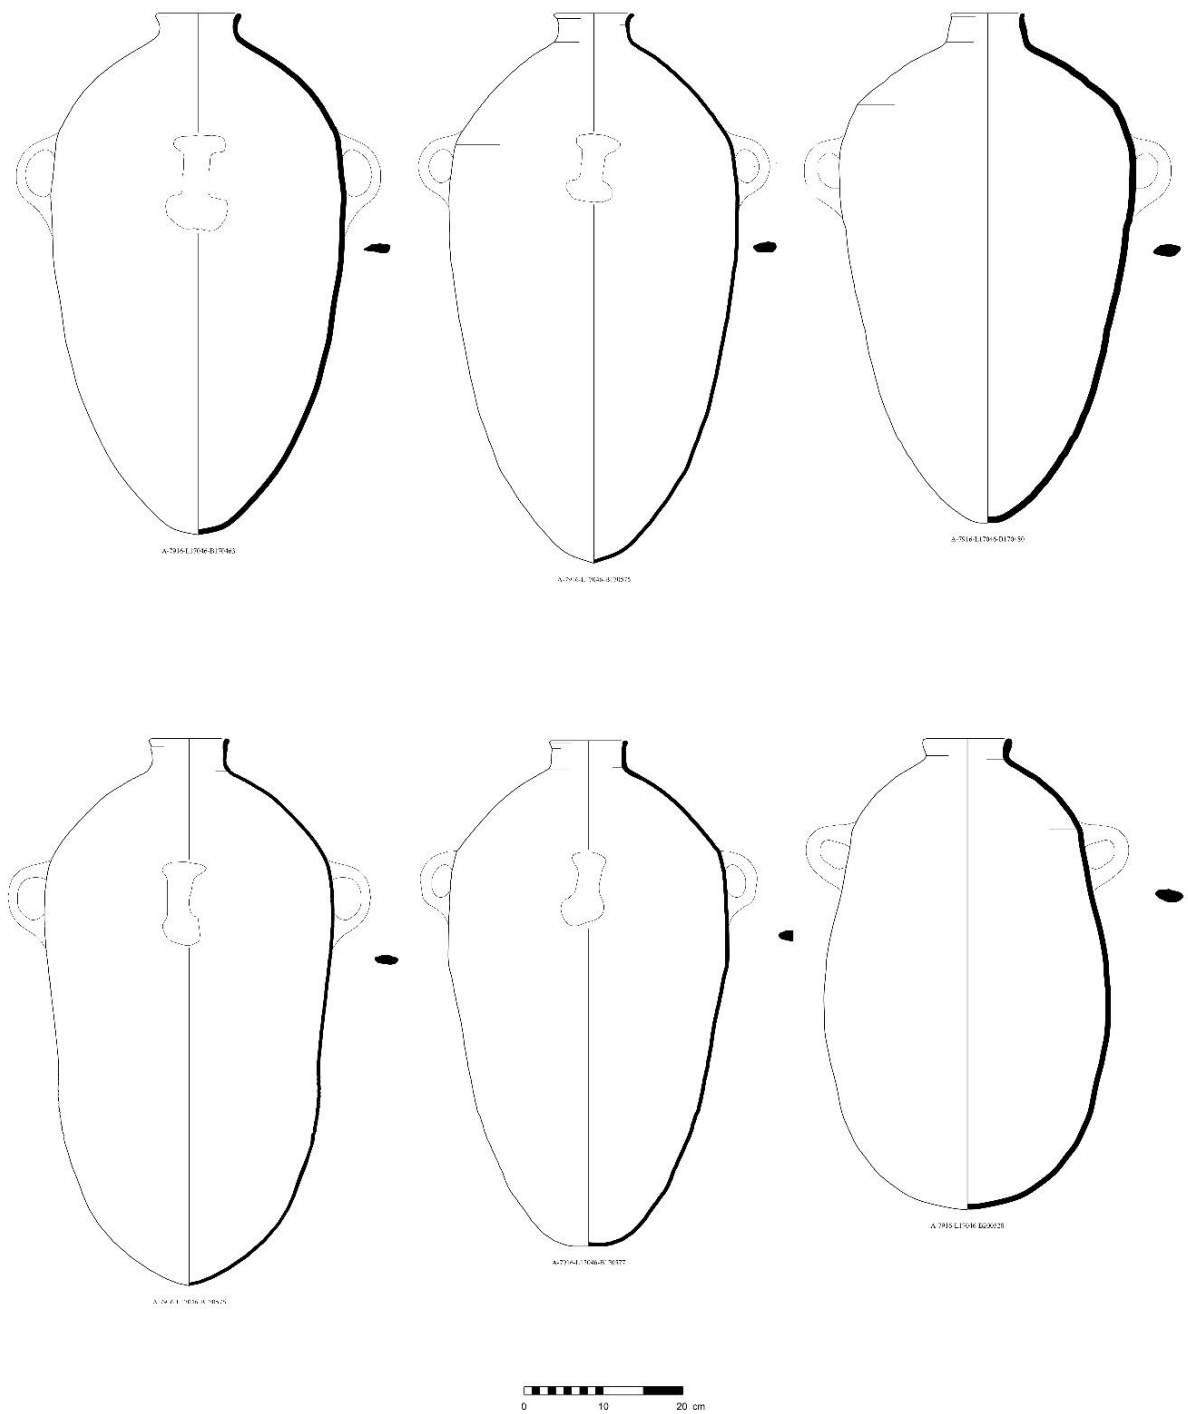

**S2 Fig.** A plate with the drawing of all storage jars found in Structure 17049 and included in this study. The pottery was digitally scanned by Ortal Harush and Argita Gyerman-Levanon.
