# Supplementary material for: Residue analysis evidence for wine enriched with vanilla consumed in Jerusalem on the eve of the Babylonian destruction in 586 BCE
Source: PubMed Central journal article supplement (PMC8963535; doi:10.1371/journal.pone.0266085), 2022-03-29
Supplement: pone.0266085.s006.pdf [file pone.0266085.s006.pdf]

S2 Table. RA results of all vessels included in this study

| Arch. context   | Sampling context | # Vessel          | # Sample         | TLE                                                                                                                                                                                                                                                                                                                                                                                                                                                                                        | WM                                                                                                                                                                                                                                                                             |              |
|-----------------|------------------|-------------------|------------------|--------------------------------------------------------------------------------------------------------------------------------------------------------------------------------------------------------------------------------------------------------------------------------------------------------------------------------------------------------------------------------------------------------------------------------------------------------------------------------------------|--------------------------------------------------------------------------------------------------------------------------------------------------------------------------------------------------------------------------------------------------------------------------------|--------------|
| Structure 17049 | IAA storage room | 170483            | 170430           | C <sub>16:0</sub> , C <sub>18:1</sub> , C <sub>20:0</sub>                                                                                                                                                                                                                                                                                                                                                                                                                                  | succinic, pimelic, suberic, azelaic, C <sub>16:0</sub> , C <sub>18:0</sub> , C <sub>18:1</sub> , C <sub>20:0</sub>                                                                                                                                                             |              |
|                 |                  |                   | 170463_II        | C <sub>14:0</sub> , C <sub>16:0</sub> , C <sub>18:1</sub> , C <sub>18:0</sub> , C <sub>20:0</sub> , MAG <sub>16:0</sub> , MAG <sub>18:0</sub>                                                                                                                                                                                                                                                                                                                                              | arsenous, succinic, malic, glutaric, citric, tartaric, pimelic, C <sub>16:0</sub> , azelaic C <sub>18:1</sub> , C <sub>18:0</sub> , C <sub>20:0</sub>                                                                                                                          |              |
|                 | In Situ          |                   | 170483_I (base)  | Propylene glycol, diethylene glycol, glycerol, 4-hydroxybenzaldehyde, vanillin, C <sub>12ol</sub> , acetovanillone, C <sub>12:0</sub> , C <sub>13ol</sub> , C <sub>14ol</sub> , C <sub>18</sub> , isopropyl myristate, C <sub>14:0</sub> , C <sub>16ol</sub> , C <sub>20</sub> , C <sub>17ol</sub> , C <sub>16:0</sub> , {4-Methoxy-2-[(trimethylsilyl)oxy]phenyl}(phenyl)methanone, C <sub>18ol</sub> , C <sub>18:0</sub>                                                                 | dimethyl malate, glutaric, tartaric, citric, succinic, C <sub>16:0</sub> , C <sub>18:0</sub> , C <sub>18:2</sub>                                                                                                                                                               |              |
|                 | IAA storage room |                   | 170483_II (body) | Not analyzed                                                                                                                                                                                                                                                                                                                                                                                                                                                                               | Dimethyl malate, tartaric, citric, succinic, fumaric, glutaric, C <sub>16:0</sub> , cyclic octaatomic sulfur, C <sub>18ol</sub> , C <sub>18:1</sub> , C <sub>18:0</sub> , C <sub>23-29</sub> , benzenamine, 4(1,1,3,3-tetramethylbutyl)-N-[4(1,1,3,3-tetramethylbutyl)phenyl]- |              |
|                 | In Situ          | 170571            | 170571_I (base)  | Propylene glycol, C <sub>6:0</sub> , diethylene glycol, tripopylen glycol, glycerol, C <sub>9:0</sub> , 4-hydroxybenzaldehyde, C <sub>10:0</sub> , Vanillin, C <sub>12:0</sub> , C <sub>14:0</sub> , C <sub>12ol</sub> , acetovanillone, 3,4 dimethyl benzoic acid, C <sub>14ol</sub> , isopropyl myristate, C <sub>16ol</sub> , C <sub>16:0</sub> , C <sub>17ol</sub> , C <sub>18ol</sub> , C <sub>18:1</sub> ; 13, C <sub>18:1</sub> , C <sub>18:0</sub> , octanamine, C <sub>20ol</sub> | Maleic, succinic, oxalic, Fumaric, glutaric, trimethyl 1,2,3-propanetricarboxylate, C <sub>14ol</sub> , isopropyl myristate, C <sub>16ol</sub> , 1,2,3-Propanetricarboxylic acid C <sub>18ol</sub> , C <sub>16:0</sub> , C <sub>18:0</sub>                                     |              |
|                 | In Situ          |                   | 170571_II (neck) | Propylene glycol, diethylene glycol, 4-hydroxybenzaldehyde, Vanillin, C <sub>12ol</sub> , acetovanillone, isopropyl myristate, C <sub>15ol</sub> , C <sub>16ol</sub> , C <sub>17ol</sub> , C <sub>18ol</sub>                                                                                                                                                                                                                                                                               | Glycerol, diethylene glycol                                                                                                                                                                                                                                                    |              |
|                 | IAA storage room | 170463_I          | 170463_I         | C <sub>14:0</sub> , C <sub>16:0</sub> , C <sub>18:0</sub> , C <sub>18ol</sub> ,                                                                                                                                                                                                                                                                                                                                                                                                            | C <sub>16:0</sub> , C <sub>18:0</sub>                                                                                                                                                                                                                                          |              |
|                 | IAA storage room | 170577/<br>190142 | 170577           | ---                                                                                                                                                                                                                                                                                                                                                                                                                                                                                        | Not analyzed                                                                                                                                                                                                                                                                   |              |
|                 | In situ, wet     |                   | 190142           | C <sub>16:0</sub> , C <sub>18:0</sub> , C <sub>23</sub> , C <sub>25</sub> , C <sub>27</sub> , C <sub>29</sub> , C <sub>31</sub>                                                                                                                                                                                                                                                                                                                                                            | Not analyzed                                                                                                                                                                                                                                                                   |              |
|                 | IAA storage room |                   | 170575           | 170575                                                                                                                                                                                                                                                                                                                                                                                                                                                                                     | C <sub>10:0</sub> , C <sub>12:0</sub> , C <sub>14:0</sub> , C <sub>16:0</sub> , C <sub>18ol</sub> , C <sub>18:1</sub> , C <sub>18:0</sub>                                                                                                                                      | Not analyzed |
|                 |                  |                   | 170580           | 170580                                                                                                                                                                                                                                                                                                                                                                                                                                                                                     | C <sub>14:0</sub> , C <sub>16:0</sub> , C <sub>18ol</sub> , C <sub>18:0</sub>                                                                                                                                                                                                  | ---          |
|                 |                  |                   | 170581           | 170581                                                                                                                                                                                                                                                                                                                                                                                                                                                                                     | ---                                                                                                                                                                                                                                                                            | Not analyzed |
|                 |                  |                   | 171029           | 171029                                                                                                                                                                                                                                                                                                                                                                                                                                                                                     | Glycerol, sugars, C <sub>16:0</sub> , C <sub>18:0</sub>                                                                                                                                                                                                                        | Not analyzed |
|                 | In situ, wet     |                   | 190140/1         | 190140                                                                                                                                                                                                                                                                                                                                                                                                                                                                                     | C <sub>16:0</sub> , C <sub>18:0</sub> , C <sub>23</sub> , C <sub>25</sub> , C <sub>27</sub> , C <sub>29</sub> , C <sub>31</sub>                                                                                                                                                | Not analyzed |
|                 |                  |                   |                  | 190141                                                                                                                                                                                                                                                                                                                                                                                                                                                                                     | C <sub>14:0</sub> , C <sub>16:0</sub> , C <sub>18:0</sub> , C <sub>23</sub> , C <sub>25</sub> , C <sub>27</sub> , C <sub>29</sub> , C <sub>31</sub>                                                                                                                            | Not analyzed |
| 190143          |                  |                   | 190143           | C <sub>14:0</sub> , C <sub>16:0</sub> , C <sub>18:0</sub> , C <sub>23</sub> , C <sub>25</sub> , C <sub>27</sub> , C <sub>29</sub> , C <sub>31</sub>                                                                                                                                                                                                                                                                                                                                        | Not analyzed                                                                                                                                                                                                                                                                   |              |

|                 |                                            |                     |         |                                                                                                                                                                                                                               |                                                                                                                                                                                                                                  |
|-----------------|--------------------------------------------|---------------------|---------|-------------------------------------------------------------------------------------------------------------------------------------------------------------------------------------------------------------------------------|----------------------------------------------------------------------------------------------------------------------------------------------------------------------------------------------------------------------------------|
| Building<br>100 | Lab<br>(in<br>proximity<br>to<br>exposure) | 21748/5             | 21753   | C <sub>12:0</sub> , C <sub>16:0</sub> , C <sub>16:0</sub> , C <sub>18:0</sub> , C <sub>18:1</sub> , C <sub>18:0</sub> , C <sub>20:0</sub>                                                                                     | Succinic, tartaric, C <sub>18:0</sub>                                                                                                                                                                                            |
|                 |                                            | 21748/3             | 21748_B | Lactic, C <sub>6:0</sub> , C <sub>8:0</sub> , glycerol, succinic, C <sub>9:0</sub> , C <sub>12:0</sub> ,<br>C <sub>16:0</sub>                                                                                                 | Butyl glycolate, succinic,<br>glutaric, tartaric,                                                                                                                                                                                |
|                 |                                            | 21748/1             | 21748_A | C <sub>9:0</sub> , vanillin, sugars, C <sub>14:0</sub> , C <sub>16:0</sub> , C <sub>16:0</sub> , C <sub>21-25</sub> ,<br>C <sub>18:0</sub> , C <sub>18:0</sub>                                                                | Arsenous, succinic,<br>oxalic, malonic, C <sub>12:0</sub> ,<br>tartaric, C <sub>14:0</sub> , C <sub>16:0</sub>                                                                                                                   |
|                 |                                            |                     | 21755   | Vanillin, C <sub>12:0</sub> , C <sub>16:0</sub> , C <sub>18:0</sub>                                                                                                                                                           | Succinic, glutaric, C <sub>16:0</sub> ,<br>C <sub>18:0</sub>                                                                                                                                                                     |
|                 |                                            | 21674/2             | 21674   | Lactic, C <sub>6:0</sub> , diethylen glycol, C <sub>8:0</sub> , glycerol, C <sub>9:0</sub> ,<br>C <sub>10:0</sub> , C <sub>12:0</sub> , sugars, C <sub>14:0</sub> , C <sub>16:0</sub> , C <sub>18:0</sub> , C <sub>18:0</sub> | Butyl glycolate, dimethyl<br>malate, C <sub>9:0</sub> , C <sub>10:0</sub> ,<br>tartaric, citric, C <sub>13:0</sub> ,<br>levoglucosan, succinic,<br>C <sub>12:0</sub> , C <sub>16:0</sub> , C <sub>18:0</sub> , C <sub>14:0</sub> |
|                 |                                            | 21748/4             | 21687   | Glycerol, C <sub>9:0</sub> , vanillin, C <sub>12:0</sub> , glycosides, C <sub>14:0</sub> ,<br>C <sub>16:0</sub> , C <sub>16:0</sub> , C <sub>18:0</sub> , C <sub>18:1</sub> , C <sub>18:0</sub>                               | malonic, succinic, tartaric                                                                                                                                                                                                      |
|                 |                                            | 21046/1<br>(pethos) | 21807   | C <sub>16:0</sub>                                                                                                                                                                                                             | Ethylene glycol, succinic,<br>C <sub>16:0</sub> , azelaic, C <sub>17:0</sub> , C <sub>18:1</sub> ,<br>C <sub>18:0</sub> , C <sub>20:0</sub> , C <sub>22:0</sub> , C <sub>29</sub> , C <sub>23:0</sub> ,<br>C <sub>24:0</sub>     |
|                 |                                            | 21834/1             | 21834   | Glycerol, C <sub>16:0</sub> , C <sub>18:0</sub> , C <sub>18:0</sub>                                                                                                                                                           | fumaric, tartaric, azelaic,<br>C <sub>16:0</sub> , C <sub>18:1</sub> , C <sub>18:0</sub> , C <sub>20:0</sub> ,<br>C <sub>22:0</sub> , C <sub>29</sub> ,<br>C <sub>24:0</sub>                                                     |
